# Supplementary material for: Structure-guided design, generation, and biofunction of PEGylated fibroblast growth factor 2 variants for wound healing
Source: Royal Society of Chemistry journal article supplement (doi:10.1039/d0nr05999d), 2020-01-01
Supplement: d0nr05999d1.pdf [file d0nr05999d1.pdf]

## Supplemental table

**Table 1. Amino acid sequences of compounds 1-7**

| Protein                     | Amino acid sequence                                                                                                                                                                             |
|-----------------------------|-------------------------------------------------------------------------------------------------------------------------------------------------------------------------------------------------|
| <b>FGF2</b>                 | >sp P09038 143-288<br>PALPEDGGSGAFPPGHFKDPKRLYCKNGGFFLRIHPDGRVDGVREKSDPH<br>IKLQLQAEERGCVVSIKGVCANRYLAMKEDGRL LASKCVTDECFFFERLES<br>NNYNTYRSRKYTSWYVALKRTGQYKLGSKTGPGQKAILFLPMSAKS              |
| <b>FGF2 variants</b>        |                                                                                                                                                                                                 |
| <b>1</b>                    | PALPEDGGSGAFPPGHFKDPKRLYCKNGGFFLRIHPDGRVDGVREKSDPH<br>IKLQLQAEERGCVVSIKGV <b>A</b> ANRYLAMKEDGRL LASKCVTDECFFFERLES<br>NNYNTYRSRKYTSWYVALKRTGQYKLGSKTGPGQKAILFLPMSAKS                           |
| <b>2</b>                    | PALPEDGGSGAFPPGHFKDPKRLYCKNGGFFLRIHPDGRVDGVREKSDPH<br>IKLQLQAEERGCVVSIKGV <b>A</b> VTDECFFFERLES<br>NNYNTYRSRKYTSWYVALKRTGQYKLGSKTGPGQKAILFLPMSAKS                                              |
| <b>3</b>                    | PALPEDGGSGAFPPGH <b>C</b> KDPKRLYCKNGGFFLRIHPDGRVDGVREKSDPH<br>IKLQLQAEERGCVVSIKGV <b>A</b> ANRYLAMKEDGRL LASKCVTDECFFFERLES<br>NNYNTYRSRKYTSWYVALKRTGQYKLGSKTGPGQKAILFLPMSAKS                  |
| <b>4</b>                    | PALPEDGGSGAFPPGHFKDPKRLYCKNGGFFLRIHPDGRVDGVREKSDPH<br>IKLQLQAEERGCVVSIKGV <b>C</b> TGPGQKAILFLPMSAKS<br>NNYNTYRSRKYTSWYVALKRTGQYKLG <b>S</b>                                                    |
| <b>PEGylated conjugates</b> |                                                                                                                                                                                                 |
| <b>5</b>                    | PALPEDGGSGAFPPGH <b>C</b> KDPKRLYCKNGGFFLRIHPDGRVDGVREKSDPH<br>IKLQLQAEERGCVVSIKGV <b>A</b> ANRYLAMKEDGRL LASK <b>A</b> VTDECFFFERLES<br>NNYNTYRSRKYTSWYVALKRTGQYKLGSKTGPGQKAILFLPMSAKS         |
| <b>6</b>                    | PALPEDGGSGAFPPGHFKDPKRLYCKNGGFFLRIHPDGRVDGVREKSDPH<br>IKLQLQAEERGCVVSIKGV <b>A</b> VTDECFFFERLES<br>NNYNTYRSRKYTSWYVALKRTGQYKLGSKTGPGQKAILFLPMSAKS                                              |
| <b>7</b>                    | PALPEDGGSGAFPPGHFKDPKRLYCKNGGFFLRIHPDGRVDGVREKSDPH<br>IKLQLQAEERGCVVSIKGV <b>A</b> ANRYLAMKEDGRL LASK <b>A</b> VTDECFFFERLES<br>NNYNTYRSRKYTSWYVALKRTGQYKLG <b>S</b> <b>C</b> TGPGQKAILFLPMSAKS |

mutated residuals were marked as red
